# Estimating the functional dimensionality of neural representations

Christiane Ahlheim<sup>a,\*</sup>, Bradley C. Love<sup>a,b</sup>,

<sup>a</sup>*Department of Experimental Psychology, University College London, 26 Bedford Way,  
London WC1H 0AP, United Kingdom*

<sup>b</sup>*The Alan Turing Institute, United Kingdom*

---

## Abstract

Recent advances in multivariate fMRI analysis stress the importance of information inherent to voxel patterns. Key to interpreting these patterns is estimating the underlying dimensionality of neural representations. Dimensions may correspond to psychological dimensions, such as length and orientation, or involve other coding schemes. Unfortunately, the noise structure of fMRI data inflates dimensionality estimates and thus makes it difficult to assess the true underlying dimensionality of a pattern. To address this challenge, we developed a novel approach to identify brain regions that carry reliable task-modulated signal and to derive an estimate of the signal's functional dimensionality. We combined singular value decomposition with cross-validation to find the best low-dimensional projection of a pattern of voxel-responses at a single-subject level. Goodness of the low-dimensional reconstruction is measured as Pearson correlation with a test set, which allows to test for significance of the low-dimensional reconstruction across participants. Using hierarchical Bayesian modeling, we derive the best estimate and associated uncertainty of underlying dimensionality across participants. We validated our method on simulated data of varying underlying dimensionality, showing that recovered dimensionalities match closely true dimensionalities. We then applied our method to three published fMRI data sets all involving processing of visual stimuli. The results highlight three possible applications of estimating the functional dimensionality of neural data. Firstly, it can aid

---

\*Corresponding author

*Email addresses:* [c.ahlheim@ucl.ac.uk](mailto:c.ahlheim@ucl.ac.uk) (Christiane Ahlheim), [b.love@ucl.ac.uk](mailto:b.love@ucl.ac.uk) (Bradley C. Love)

evaluation of model-based analyses by revealing which areas express reliable, task-modulated signal that could be missed by specific models. Secondly, it can reveal functional differences across brain regions. Thirdly, knowing the functional dimensionality allows assessing task-related differences in the complexity of neural patterns.

*Keywords:* neural representations, dimensionality reduction, multivariate analysis

---

## 1. Introduction

A growing number of fMRI studies are investigating the representational geometry of voxel response patterns. For example, using representational similarity analysis (RSA; Kriegeskorte and Kievit, 2013), researchers have characterized visual object representations along the ventral stream (Khaligh-Razavi and Kriegeskorte, 2014) and how these representations vary across tasks (Bracci et al., 2017).

Interpreting representational geometry in neural responses can be difficult. For example, RSA tests for a hypothesized representational pattern, but an important and more fundamental question should be addressed first, namely whether there is any dimensionality to the underlying neural pattern and, if so, what that dimensionality is.

Knowing whether a pattern has dimensionality should be prerequisite for RSA and other multivariate representational analyses because a particular similarity structure can only be found when there is sufficient dimensionality to represent the proposed relations. For example, searching for a flavor space with dimensions sweet, sour, bitter, salty and umami would be a fool's errand in brain areas that contain little or no dimensionality.

Although previous studies have made substantial progress in identifying whether any dimensionality underlies an observed pattern (Naselaris et al., 2011; Diedrichsen et al., 2016; Walther et al., 2016; Allefeld and Haynes, 2014), a straightforward, general, robust, open source, and computationally efficient procedure for this challenge would be welcomed. Moreover, progress would be welcomed on perhaps the more challenging task of estimating the degree of dimensionality underlying a pattern. Independent of the particular geometry, the dimensionality of a neural pattern is informative of how many features of a task are represented in a brain region, which can inform our understanding of an area's function.

There are many methods of dimensionality reduction and estimation, most of which involve low-rank matrix approximation and aim to maximize the correspondence between the original and the approximated matrix. For example, two common approaches to estimate the dimensionality of an observed neural or behavioral pattern are principal component analysis (PCA) or relatedly, multidimensional scaling (MDS).

PCA, or the closely related factor analysis and singular value decomposition (SVD) (Hastie et al., 2009), is widely used in the study of individual differences and aids estimating how many latent components, or "factors",

38 underlie a pattern of (item) responses within or across participants, as for  
39 instance in the context of intelligence (Spearman, 1904) or personality tests  
40 (Cattell, 1947). In the context of neuroimaging, PCA has been used to iden-  
41 tify brain networks (Huth et al., 2012; Friston et al., 1993). PCA derives  
42 how much variance of the observed pattern is explained by each underlying  
43 component.

44 Similarly, MDS finds the best representation of original distances in a  
45 low-dimensional space (Kriegeskorte and Kievit, 2013). For example, two  
46 stimuli like a chair and table that are very close to each other in the high-  
47 dimensional space will be represented closely in the low-dimensional projec-  
48 tion achieved by MDS, whereas two stimuli that were very distant from each  
49 other, for instance a chair and a bunny, will be projected far apart. MDS has  
50 been successfully applied to behavioral as well as neural data to reveal which  
51 stimulus features underly observed representational geometries (Bracci and  
52 Op de Beeck, 2016; Kriegeskorte and Kievit, 2013; Kriegeskorte et al., 2008),  
53 though it has been questioned to which extent results from MDS are inter-  
54 pretable (Goddard et al., 2017). For reasons outlined below, we will focus on  
55 SVD to estimate the dimensionality of neural representations, though other  
56 methods could be paired with our general approach, including nonlinear ap-  
57 proaches such as Nonlinear PCA (Kramer, 1991).

58 Estimating the dimensionality of neural data brings its own unique chal-  
59 lenges. In a noise-free scenario, dimensionality can be defined as the number  
60 of linear orthogonal components (singular- or eigenvalues) underlying a ma-  
61 trix that are larger than zero (Shlens, 2014), indicating that the component  
62 fits some variance in the data. Unfortunately, actual recordings of neural ac-  
63 tivity always contain noise, which inflates non-signal components above zero  
64 (Fusi et al., 2016; Diedrichsen et al., 2013). This noise makes it challenging  
65 to determine which areas contain signal and, if so, what the dimensionality  
66 of the signal is.

67 One criterion, which we adopt in the work reported here, is to choose  
68 the number of components that should maximize reconstruction accuracy  
69 (measured by correlation) on new data (i.e., test data). While even for  
70 data with low or moderate true dimensionality more components will always  
71 increase fit for existing data (i.e., training data), performance on test data  
72 (i.e., generalization, prediction) will usually be best for a moderate number of  
73 components because these components largely reflect true signal as opposed  
74 to noise in the observed training sample.

75 The problem of distinguishing between signal and noise in a neural pat-

76 tern is related to the bias-variance trade-off in supervised learning and model-  
77 selection. Overly simple models (few components) are highly biased, fitting  
78 training data poorly and not performing well on test data. These overly  
79 simple models cannot pick-up on nuances in the signal. Conversely, overly  
80 complex models (many components) are too sensitive to the variance in the  
81 training data (i.e., overfit). Although they fit the training data very well,  
82 overly complex models treat noise in the training data as signal and, there-  
83 fore, generalize poorly. Thus, the sweet spot for test performance should be  
84 at some moderate number of components that largely reflect true signal (see  
85 Figure 1 A). Thus, identifying the true number of underlying components is  
86 analogous to deciding which model best explains the data.

87 One naive way to navigate this trade-off between simple and complex  
88 models is to use some arbitrary cutoff, such as including the number of com-  
89 ponents that captures some amount of variance in the training data or decid-  
90 ing based on visual inspection which components may carry signal (known as  
91 scree plot, Cattell, 1966). In the case of fMRI, where the signal-to-noise ratio  
92 depends on multiple factors like scanner settings, experimental design, and  
93 physiological activity (Huettel et al., 2003), estimating the underlying dimen-  
94 sionality based on an arbitrary cut-off criterion for explained variance could  
95 be misleading. Likewise, although identifying relevant components via visual  
96 inspection works for small datasets, it is not applicable to large datasets as  
97 fMRI data, as it would require a manual decision for each set of voxels. Fur-  
98 thermore, the size of fMRI datasets (usually thousands of voxels) calls for  
99 a computationally efficient and automated approach, making estimating the  
100 dimensionality for the whole brain feasible. Thus, for neuroimaging data,  
101 there is a need for an efficient, systematic and objective approach that can  
102 both identify areas with statistically significant dimensionality and provide  
103 a useful estimate of the underlying dimensionality.

104 Previous efforts to estimate the dimensionality of neural response pat-  
105 terns have applied linear classifiers to neural data to evaluate dimensionality  
106 (Rigotti et al., 2013; Diedrichsen et al., 2013). Rigotti et al. (2013) were able  
107 to show that dimensionality of single-cell recordings in monkey PFC is linked  
108 to successful task-performance, indicating that dimensionality of neural pat-  
109 terns is task-sensitive. In line with this, Diedrichsen et al. (2013) showed  
110 that the dimensionality of motor cortex representations differs depending on  
111 the task. Using a combination of PCA and linear Gaussian classifiers, the  
112 authors showed that motor cortex representations of different force levels are  
113 low dimensional, whereas usage of different fingers was associated with multi-

114 dimensional neural patterns (Diedrichsen et al., 2013). Notably, both studies  
115 focused on estimating task-related changes in dimensionality in a prescribed  
116 brain region, rather than estimating which areas across the brain had signif-  
117 icant dimensionality. Other methods test dimensionality solutions against a  
118 noise distribution constructed by permuting the original data Lehy et al.  
119 (2014). However, such methods do not respect the spatial and temporal cor-  
120 relation structure in fMRI data as our method does. Although these methods  
121 highlight the potential to estimate the dimensionality of a neural pattern in  
122 a prescribed region, they are computationally demanding and require close  
123 inspection of the results, which can be impractical in situations such as in a  
124 searchlight analysis.

125 In the present work, we expand on previous contributions by evaluating  
126 a novel approach that, in a robust and computationally efficient manner,  
127 tests which areas display statistically significant dimensionality, estimates the  
128 dimensionality, and provides an indication of the uncertainty of the estimate.

129 We combine singular value decomposition (SVD) and cross-validation to  
130 identify areas across the brain with underlying dimensionality. We derive  
131 which of all possible low-dimensional reconstructions of the fMRI signal is  
132 the best dimensionality estimate of a held-out test run, and quantify the  
133 goodness of the low-dimensional reconstruction via Pearson correlation.

134 Using a cross-validation procedure to identify the best dimensionality es-  
135 timate boosts that only components that carry signal and thus generalize to  
136 new data are kept. By assessing the significance of the correlation, we can  
137 distinguish between areas that show reliable signal with underlying dimen-  
138 sionality vs. areas that do not show a reliable task-modulation. We will refer  
139 to this task-dependent dimensionality as functional dimensionality. After  
140 establishing significant functional dimensionality, we use Bayesian modeling  
141 to derive a population estimate and associated uncertainty of the degree of  
142 dimensionality.

143 We define functional dimensionality as reliable task-dependent changes  
144 in a neural pattern that generalize across runs within a subject, though the  
145 representational geometry need not be common across subjects. A prerequi-  
146 site for functional dimensionality is that neural patterns are reliable within  
147 subjects. As we show below (see also Figure 1B), our approach can find the  
148 low-dimensional projection of a neural pattern that generalizes best across  
149 runs.

150 Through simulations and evaluation of three (published) fMRI datasets,  
151 we find that our method successfully identifies areas with significant func-

152 tional dimensionality and provides reasonable estimates of the underlying  
153 dimensionality. In the first fMRI dataset, participants performed a catego-  
154 rization task which required differential attention to various stimulus features  
155 (Mack et al., 2013). The second study investigated shape- and category spe-  
156 cific neural responses to the presentation of natural images (Bracci and Op de  
157 Beeck, 2016). The third study involved categorization tasks that varied sys-  
158 tematically in their attentional demands (Mack et al., 2016), which we predict  
159 should affect functional dimensionality.

160 Across all three studies, we were able to identify areas carrying functional  
161 dimensionality in a manner that supported and extended the original find-  
162 ings. Focusing on wholebrain effects in the the first two studies, we identified  
163 a consistent network of areas showing functional dimensionality during vi-  
164 sual stimulus processing. This network encompassed areas that were reported  
165 by the original authors as being task-relevant, identified through represen-  
166 tational similarity analysis and cognitive model fitting (Bracci and Op de  
167 Beeck, 2016; Mack et al., 2013). Furthermore, functional dimensionality was  
168 revealed in additional areas, highlighting the sensitivity of our method and  
169 suggesting that reliable task-modulated signal was present that was not ex-  
170 plained by the models the original authors tested. In the last study, we  
171 combined a region-of-interest approach and multilevel Bayesian modeling to  
172 show that dimensionality varied depending on task-requirements, which fol-  
173 lows from the original authors' claims but remained untested until now (Mack  
174 et al., 2016). We outline how the notion and identification of functional di-  
175 mensionality can aid the analysis and understanding of neuroimaging data  
176 in various ways.

## 177 2. General Methods

178 Neuroimaging data, such as fMRI, M/EEG, or single-cell recordings, can  
179 be represented as a matrix of  $n$  voxels, neurons, or sensors  $\times$   $m$  conditions.  
180 For example, BOLD response patterns in the fusiform face area (FFA) to  
181 3 different stimulus conditions can be expressed as a matrix  $Y$  of the size  
182  $n$  (number of voxels)  $\times$  3 (face, house, or tool stimulus condition). The  
183 maximum possible dimensionality is determined by the minimum of  $n$  and  
184  $m$ , which in this example would be 3, assuming many voxels in FFA were  
185 included in the analysis. As fully explained below, the maximum possible  
186 dimensionality is  $m - 1$  (in this example,  $3 - 1 = 2$ ) because each voxel (i.e.,  
187 matrix row) is mean-centered. In this toy example, rest is implicitly included

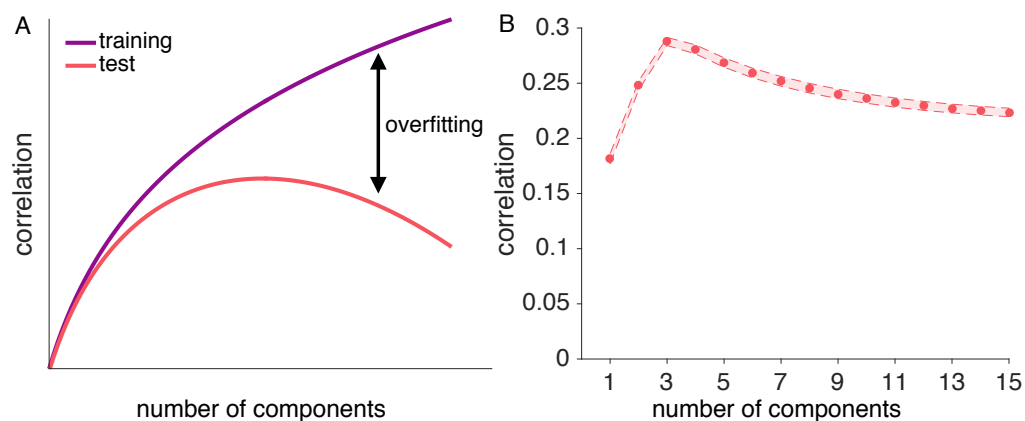

Figure 1: Illustration of the concept of overfitting and generalizability. A: As more components are added to a low-dimensional reconstruction, the correlation between the training data and the reconstruction approaches the maximum of 1 for a full-dimensional reconstruction (purple curve). Adding components is equivalent to adding model parameters to improve fit, which reduces the model's bias and increases its variance. For the correlation between the reconstructed training and independent test data (red curve), adding components initially improves performance but at some point reduces performance due to overfit (see Parpart et al., 2017, for a related illustration). B: Reconstruction correlations achieved by all possible low-dimensional reconstructions for a simulated ground-truth dimensionality of 4. Reconstruction correlations rise as more components are added up to the point where the true dimensionality is reached, and decrease afterwards. Results are averaged across 6 runs and 1000 simulated voxel patterns.



188 as a condition, that is, even if all conditions showed the same activity pattern,  
189 the estimated dimensionality would be 1. Mean-centering the voxel patterns  
190 beforehand accounts for this.

191 However, functional dimensionality could be lower. For example, dimen-  
192 sionality would be lower if the region only responded to face stimuli and  
193 showed the same lower response to house and tool stimuli.

194 The approach to dimensional estimation we present here is modular and  
195 estimates a matrix’s dimensionality by combining low-rank approximation  
196 with cross-validation and significance testing. This modularity allows to  
197 flexibly choose the dimensionality reduction technique which best fits with  
198 ones requirements. Here, we used SVD (which is often used to compute  
199 PCA solutions) because it is a well-understood, easy to implement, and a  
200 computationally efficient low-rank matrix approximation.

201 The choice of SVD, as well as how the data matrix is normalized is in-  
202 formed by our understanding of the underlying neural signal. Because voxels  
203 differ greatly from one another in their overall activity level and activity  
204 levels can drift over runs, we mean-center each row (i.e., voxel) of the data  
205 matrix by run. In contrast, we do not mean-center each column, as would  
206 typically be done with approaches that focus on the covariance of the col-  
207 umn vectors (e.g., PCA). The reason we do not normalize by column (i.e.,  
208 condition) is that we are open to the possibility that different stimuli may  
209 be partially coded by overall activity levels of a population of voxels. For  
210 example, imagine a brain area only responds strongly to faces, but not to  
211 other stimuli. An SVD with demeaned voxels (i.e., rows) would be sensi-  
212 tive to this dimension of representation, whereas a procedure that effectively  
213 worked with demeaned columns would not be sensitive to this task-driven  
214 difference in neural activity (see Davis et al., 2014; Hebart and Baker, 2017;  
215 Diedrichsen and Kriegeskorte, 2017, for a related discussion).

216 In the following section, we describe how a combination of SVD and  
217 cross-validation can be used to test whether an observed neural pattern can  
218 be successfully reconstructed using a low-rank approximation, assessed as a  
219 significant Pearson correlation between a low-rank approximation and a held  
220 out test set, and how this technique provides an estimate of the pattern’s un-  
221 derlying dimensionality (see Figure 2 for an overview of all steps). As all our  
222 examples are fMRI data sets, we will describe the steps using fMRI termi-  
223 nology, though the procedure could be applied to any type of neuroimaging  
224 data. We provide the code and data to replicate the analyses presented here  
225 and for use on other datasets at [osf.io/tpq92](https://osf.io/tpq92).

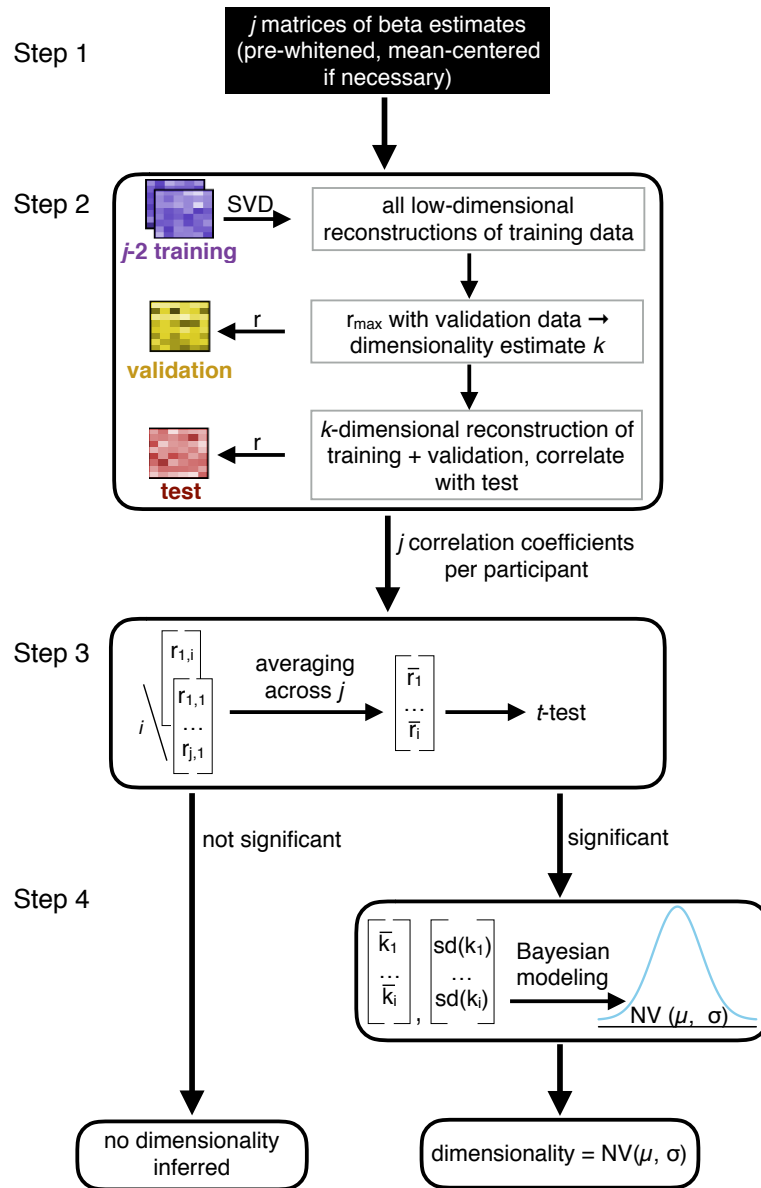

---

Figure 2 (*previous page*): Step 1: Prior to dimensionality estimation, raw data are pre-processed with preferred settings and software and beta estimates derived from a GLM are obtained for each condition of interest. The resulting  $j$  matrices of size  $n$  (number of voxels)  $\times m$  (number of conditions) are pre-whitened and mean-centered (by row, i.e., voxel) to remove baseline differences across runs. Step 2: a combination of cross-validation and SVD is implemented to find the best dimensionality estimate  $k$  for each run  $j$ . Pearson correlations between all possible low-dimensionality reconstructions of the data and a held-out test set quantify the goodness of each reconstruction for each run  $j$  (see Figure 3 for details). Step 3: the resulting  $j$  correlations are averaged for each participant and tested for significance, for instance using  $t$ -tests, across all participants. Step 4: If the reconstruction correlations are significant across participants, a hierarchical Bayesian model can be used to derive the best estimate of the degree of functional dimensionality (see Figure 4 for details). For each participant, the average estimated dimensionality and standard deviation of this estimate is calculated and a population estimate and respective standard deviation (uncertainty in the estimate) is derived across all participants.

### 226 2.1. Step 1: Data pre-processing

227 We developed the presented method with application to fMRI data in  
228 mind, though it can be easily adapted to fit requirements of single cell record-  
229 ings or M/EEG data. The method takes beta estimates resulting from a  
230 GLM fit to the observed BOLD response as input. In all studies presented  
231 here, standard pre-processing steps were performed using SPM 12 (Wellcome  
232 Department of Cognitive Neurology, London, United Kingdom), but the pre-  
233 cise nature of the preprocessing and implemented GLM is not critical to our  
234 method. Functional data were motion corrected, co-registered and spatially  
235 normalized to the Montreal Neurological Institute (MNI) space.

236 To reduce the impact of the structured noise, which is correlated across  
237 voxels, on the dimensionality estimation and to improve the reliability of  
238 multivariate voxel response patterns (Walther et al., 2016), we applied mul-  
239 tivariate noise-normalization, that is, spatial pre-whitening, before estimat-  
240 ing the functional dimensionality. We used the residual time-series from the  
241 fitted GLM to estimate the noise covariance  $\Sigma_{noise}$  and used regularization to  
242 shrink it towards the diagonal (Ledoit and Wolf, 2004). Each  $n \times m$  matrix  
243 of beta estimates  $Y$  was then multiplied by  $\Sigma_{noise}^{-\frac{1}{2}}$  (Walther et al., 2016).

244 In fMRI data, the baseline activation can differ across functional runs.

245 This has important implications for our approach presented here, as it can  
246 bias the correlation between neural patterns across runs. To account for this,  
247 we demeaned the pre-whitened beta estimates across conditions, resulting in  
248 an average estimate of zero for each voxel. This demeaning reduces the  
249 possible maximum dimensionality of the data to  $k_{max} = m - 1$ . Notably,  
250 demeaning of voxels is conceptually different from demeaning conditions,  
251 which would have been implemented by PCA, as it preserves differences  
252 between conditions, whereas PCA would remove those.

### 253 *2.2. Step 2: Evaluating all possible SVD (dimensional) models*

254 The dimensionality of a matrix is defined as its number of non-zero sin-  
255 gular values, identified via singular value decomposition (SVD). SVD is the  
256 factorization of an observed  $n \times m$  matrix  $M$  of the form  $U\Sigma V^T$ .  $U$  and  
257  $V$  are matrices of size  $m \times m$  and  $n \times n$ , respectively, and  $\Sigma$  is an  $n \times m$   
258 matrix, whose diagonal entries are referred to as the singular values of  $M$ .  
259 A  $k$ -dimensional reconstruction of the matrix  $M$  can be achieved by only  
260 keeping the  $k$  largest singular values in  $\Sigma$  and replacing all others with zero,  
261 resulting in  $\tilde{\Sigma}$ . This is known as Eckart-Young theorem (Eckart and Young,  
262 1936), leading to equation 1:

$$\tilde{M} = U\tilde{\Sigma}V^T \quad (1)$$

263 To estimate the dimensionality of fMRI data, we applied SVD to  $j$ (number  
264 of runs) matrices  $Y$  of  $n$ (number of voxel)  $\times$   $m$ (number of beta estimates),  
265 with the restriction of  $n > m$ .

266 Critically, fMRI beta estimates are noisy estimates of the true signal.  
267 In the presence of noise, all singular values of a matrix will be non-zero,  
268 requiring the definition of a cut-off criterion to assess the number of singular  
269 values reflecting signal. Removing noise-carrying components from a matrix  
270 is beneficial, as it avoids overfitting to the noise and thus, improves the  
271 generalizability of the low-dimensional reconstruction to another sample (see  
272 Figure 1 A for an illustration of the concept of overfitting). We aimed to avoid  
273 any subjective (arbitrary) criterion as percentage of explained variance or  
274 alike (Cattell, 1966). To that end, we implemented a nested cross-validation  
275 procedure at the core of our method to identify singular values that carry  
276 signal (see step 1 of the general overview depicted in Figure 2 and Figure 3  
277 for a detailed illustration of the cross-validation approach). This allows us  
278 to reduce the inflation of dimensionality of fMRI data due to noise and test  
279 which areas of the brain carry signal with functional dimensionality.

280 Data are partitioned  $j \times (j - 1)$  times into training ( $Y_{train}$ ), validation  
281 ( $Y_{val}$ ), and test ( $Y_{test}$ ) data. The (demeaned and pre-whitened)  $j - 2$  training  
282 runs are averaged, and SVD is applied to the resulting  $n \times m$  matrix  $\bar{Y}_{train}$ .  
283 We then build all possible low-dimensional reconstructions of the averaged  
284 training data, with dimensionality ranging from 1 to  $m - 1$ . Low-dimensional  
285 reconstructions are generated by keeping only the  $k$  highest singular values  
286 and setting all others to zero. Each low-dimensional reconstruction of matrix  
287  $\bar{Y}_{train}$  is correlated with the held-out  $Y_{val}$ . This is repeated for each possible  
288 partitioning in training and validation, resulting in  $j - 1 \times m - 1$  correlation  
289 coefficients. Correlations are Fisher's z-transformed and averaged across the  
290  $j - 1$  partitionings. The dimensionality with the average highest correlation  
291 is picked as best estimate  $k$  of the underlying dimensionality. As keeping  
292 components that reflect noise rather than signal lowers the correlation with  
293 an independent data set, the highest correlation is not necessarily achieved  
294 by keeping more components. This procedure thus avoids inflated dimen-  
295 sionality estimates.

296 After identifying the best dimensionality estimate  $k$  for run  $j$ , the training  
297 and validation runs from 1 to  $j - 1$  are averaged together and SVD is applied  
298 to the averaged data. We then generate a  $k$ -dimensional reconstruction of  
299 the averaged data. The quality of this final low-dimensional reconstruction  
300 is measured as Pearson correlation with  $Y_{test}$ . We chose Pearson correla-  
301 tion instead of mean-square error (MSE) because Pearson correlation is scale  
302 invariant.

### 303 *2.3. Step 3: Determining statistical significance*

304 The approach results in  $j$  estimates of the underlying dimensionality and  
305  $j$  corresponding test correlations per participant. Under the null-hypothesis  
306 of no dimensionality, and thus, only noise present in the matrix, reconstruc-  
307 tion correlations averaged across runs are distributed around zero. Thus,  
308 across-participants significance of the averaged reconstruction correlations  
309 can be assessed using one-sample  $t$ -tests or non-parametric alternatives, as  
310 for instance permutation tests (Nichols and Holmes, 2003), and established  
311 correction methods for multiple comparisons, like threshold-free cluster en-  
312 hancement (TFCE, see Smith and Nichols, 2009).

313 Only when a significant,  $k$ -dimensional, reconstruction correlation is found  
314 across participants, do we refer to an area as showing functional dimension-  
315 ality. It should be noted that a significant reconstruction correlation only  
316 indicates that the underlying functional dimensionality is one or bigger.

317 More evidence for a dimensionality of two or larger can be gathered by  
318 removing not only the voxel-mean before estimating the dimensionality, but  
319 also the condition mean, which removes a potential source of univariate dif-  
320 ferences between conditions. However, as discussed in Davis et al. (2014)  
321 and Hebart and Baker (2017), this does not indubitably mean that the di-  
322 dimensionality of the pattern is two or larger.

#### 323 *2.4. Step 4: Estimating the degree of functional dimensionality*

324 The previously described steps allow us to identify which areas carry  
325 reliable signal with functional dimensionality, but do not provide a precise  
326 estimate of the degree of the underlying dimensionality. The best population  
327 estimate of a region’s functional dimensionality should optimally combine  
328 information across participants, giving more weight to participants with more  
329 reliable estimates, and should furthermore reflect how peaked the distribution  
330 of underlying population estimates is, accounting for the fact that different  
331 participants could express different true dimensionality.

332 Given a significant reconstruction correlation across participant,  $j$  esti-  
333 mates of the degree of dimensionality are obtained (for each voxel, i.e. center  
334 of a searchlight, or ROI) for each participant. In a noise-free scenario, all  
335  $j$  estimates reflect the true dimensionality and thus, direct inference could  
336 be made solely based on these estimates. Under noise, these estimates could  
337 over- or underestimate the true dimensionality. The less reliable the  $j$  dimen-  
338 sionality estimates, the higher the variance across them. Mere averaging of  
339 the  $j$  estimates across participants would discard this information, weighting  
340 all participants equally, irrespective of their reliability. Down-weighting the  
341 influence of less reliable dimensionality estimates on the population estimate  
342 leads to a better population estimate (Kruschke, 2014).

343 To account for this, we implemented a multilevel Bayesian model using the  
344 software package Stan (The Stan Development Team, 2017). Given the mean  
345 and standard deviation of  $j$  dimensionality estimates per participant, the  
346 model derives the best estimate for the true degree of dimensionality across all  
347 participants. Due to the nature of the multilevel model, individual estimates  
348 are subject to shrinkage towards the estimated population mean, and the  
349 degree of shrinkage is more pronounced for estimates with higher variance and  
350 stronger deviation from the estimated population mean (Kruschke, 2014).

351 Additionally to the estimate of the population dimensionality, the model  
352 returns estimates for the population dimensionality’s variance, reflecting the  
353 uncertainty of the dimensionality estimate.

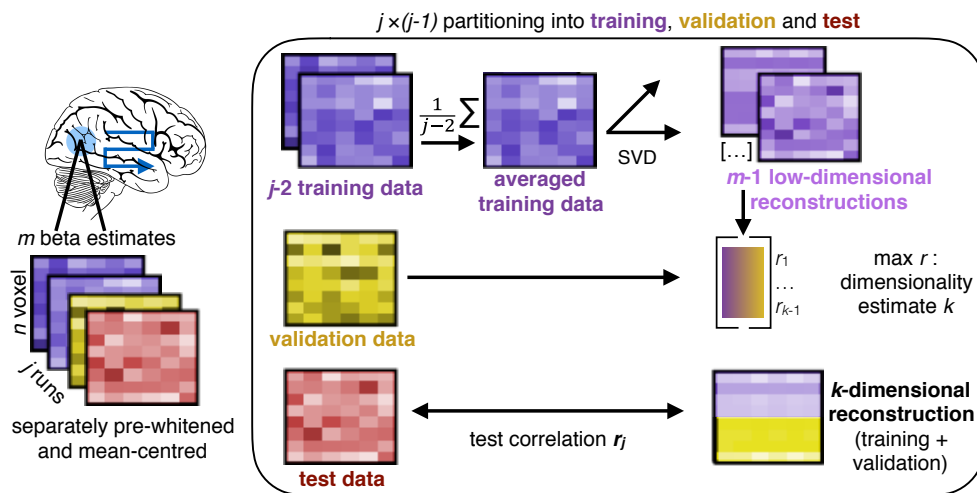

Figure 3: Illustration of the combination of SVD and cross-validation, corresponding to step 2 in Figure 2. For each searchlight or ROI,  $j$  (number of runs)  $\times$   $n$  (number of voxels)  $\times$   $m$  (number of beta estimates) matrices are used to estimate the functional dimensionality. For all possible partitions of  $j$  runs into training, validation and test data, we first average all training runs and build all possible low-dimensional reconstructions of these averaged data using SVD. All reconstructions are then correlated with the validation run, resulting in  $j - 1$  correlation coefficients and respective dimensionalities. The dimensionality that results in the highest average correlation across  $j - 1$  runs is picked as dimensionality estimate  $k$  for this fold and a  $k$ -dimensional reconstruction of the average of the training and validation runs is correlated with a held-out test-run, resulting in a final reconstruction correlation. In total,  $j$  reconstruction correlations are returned that can be averaged and tested for significance across participants using one-sample t-tests or alike. To derive a better estimate of the underlying dimensionality, the  $j$  dimensionality estimates per participant can be submitted to the hierarchical Bayesian model (step 4 in Figure 2)

354 For each individual participant, the model estimates the participant's  
355 true underlying dimensionality and returns the uncertainty of this estimate.  
356 Though not our focus here, individual differences in dimensionality estimates  
357 could be linked to other measures, such as task performance.

#### 358 *2.4.1. Model parametrization*

359 As can be seen in Figure 4, the Bayesian model has four levels: the prior  
360 distributions, the population distributions, the individual distributions, and  
361 the observed estimates. Apart from the bottom level, that is, the observed  
362 estimates, distributional assumptions must be made. For each individual  
363 participant,  $j$  dimensionality estimates are observed. Those reflect noisy  
364 estimates of a participant's true underlying dimensionality. We chose a truncated  
365  $t$ -distribution as parametrization of the level of the true individual  
366 dimensionalities. The parameters of this distribution were the participant's  
367 estimate of the true underlying dimensionality  $\mu_i$ , subject to shrinkage due  
368 to other participants' estimates and the individual's standard deviation of  
369 dimensionality estimates. The truncated  $t$ -distribution can account for the  
370 limited range of possible data points, as there is a natural maximum and  
371 minimum dimensionality that could be observed. It furthermore reflects the  
372 assumption that under noise, the true dimensionality of an observed pattern,  
373 that is, the mean of the  $t$ -distribution, would still have the highest probabil-  
374 ity of estimation, with the dispersion of the distribution depending on the  
375 number of observations made (here, runs). On the population level, we chose  
376 a truncated normal distribution with mean of  $\mu$  and a standard deviation of  
377  $\sigma$ , limited to the range of the possible dimensionality estimates. This was  
378 chosen to reflect the assumption that participants from the same population  
379 should have similar, though not necessarily identical functional dimensional-  
380 ities. The combination of a normal distribution on the population level and a  
381 truncated  $t$ -distribution on the single subject level ensured that participants  
382 with largely dividing dimensionality estimates are shrunk towards the mean  
383 of the overall sample in an optimal way.

384 As we did not have strong priors regarding the dimensionality of the  
385 neural patterns, we implemented a uniform prior over the population dimen-  
386 sionality estimates, reflecting that the dimensionality could be anything from  
387 1 to  $m - 1$ .

388 Notably, this does not imply that all participants need to show an es-  
389 timated functional dimensionality larger than zero, but rather reflects the  
390 assumption that a significant second-level functional dimensionality suggests



391 a non-zero functional dimensionality in the population.

392 The prior distribution can be adapted to be informative for studies esti-  
393 mating the functional dimensionality of neural patterns with stronger priors.

394 Figure 4 shows an illustration of the model.

395 The model is formally expressed in Equation 2.

$$\begin{aligned} y_i &\sim T(j-1, \hat{\mu}_i, \hat{\sigma}_i), 1 \leq \hat{\mu}_i \leq m-1, \text{ with} \\ \hat{\mu}_i &\sim N(\mu, \sigma), 0 \leq \mu \leq \sigma_{max}, \\ \hat{\sigma}_i &\sim N(\sigma_i, 1), 0 \leq \sigma_i \leq \max(\sigma_i), \\ \mu &\sim U(1, \max(m-1)), \text{ and} \\ \sigma_i &\sim U(0, \max(\sigma_i)). \end{aligned} \tag{2}$$

396 The maximum population variance was defined as the expected variance  
397 of this uniform distribution  $\frac{1}{12}(m-2)^2$ , reflecting the prior that each partici-  
398 pant could express a different, true dimensionality. On the subject-level, the  
399 maximum variance was defined as

$$\max(\sigma_i^2) = \frac{j}{j-1} * (m-1 - \frac{m}{2})^2 \tag{3}$$

400 which corresponds to the maximum possible variance across  $j$  dimension-  
401 ality estimates.

402 The  $j$  estimates of a participant's dimensionality were not independent,  
403 since the training data overlapped. Thus, the standard deviation of the  
404 estimates will be underestimated. The degree of this underestimation will be  
405 the same for all participants though, which allows us to rely on the observed  
406 standard deviation as a proxy for the estimation noise without correcting.

### 407 3. Simulations

408 Before applying our method to real fMRI data, we tested the validity of  
409 our method through dimensionality-recovery studies on simulated fMRI data.  
410 Estimating the dimensionality for simulated cases where the true underlying  
411 dimensionality is known allowed us to assess whether our procedure results  
412 in a reliable dimensionality estimate.

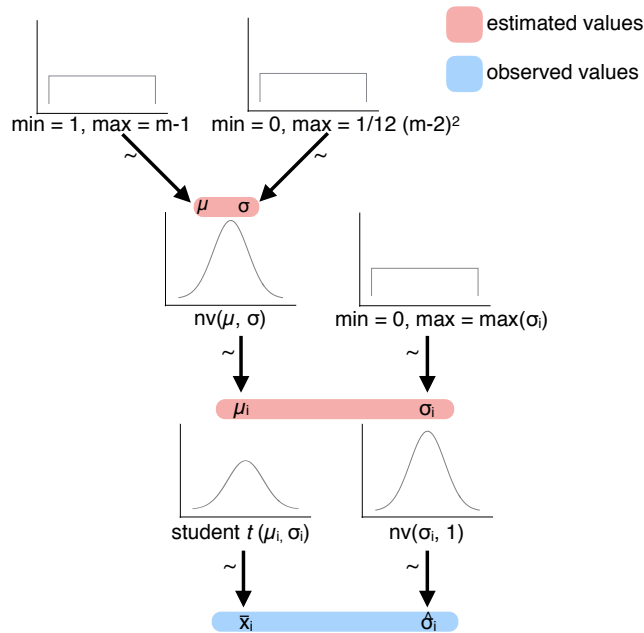

Figure 4: Illustration of the implemented multilevel model to estimate the degree of functional dimensionality, corresponding to step 4 in Figure 2. The observed averaged dimensionality estimates per participant are assumed to be sampled from an underlying subject-specific  $t$ -distribution with mean  $\mu_i$  and standard deviation  $\sigma_i$ . The standard deviation  $\hat{\sigma}_i$  of the participants' dimensionality estimates is assumed to be sampled from a normal distribution with mean  $\sigma_i$  and a standard deviation of 1. The subject-specific  $t$ -distributions of  $\mu_i$  are assumed to come from a population distribution with a normally distributed mean  $\mu$  and variance  $\sigma$ . Subject-specific standard deviations  $\sigma_i$  are assumed to come from a uniform distribution, ranging from 0 to  $\max(\sigma_i)$ . At the top level, a uniform prior is implemented. Mean and variance of the normal distribution of population means  $\mu$  are assumed to come from a uniform distribution ranging from 1 to  $m - 1$  and 0 to  $\sigma_{max}$ , respectively. Distributions were derived from [https://github.com/rasmusab/distribution\\_diagrams](https://github.com/rasmusab/distribution_diagrams).

413 *3.1. Methods*

414 Simulated data were created using the RSA toolbox (Nili et al., 2014) and  
415 custom Matlab code. Parameters of the simulation were picked in accordance  
416 with the study by Mack and colleagues (2013). We simulated fMRI data of  
417 presentation of 16 different stimuli, presented for 3 sec, three repetitions per  
418 run, and six runs, closely matching the specifications of the original study.  
419 To mimic a searchlight-approach, we defined the size of the cubic sphere  
420  $4 \times 4 \times 4$  voxels, resulting in a simulated pattern of 64 voxels.

421 We simulated data with a dimensionality of 4, 8, and 12 and ten steps  
422 of exponentially increasing noise levels to investigate how noise affects di-  
423 mensionality estimates, and how this effect interacts with the ground-truth  
424 dimensionality. In order to apply hierarchical Bayesian model, we created  
425 simulated data for 20 'participants'. For each simulated participant, the  
426 noise level was drawn from a normal distribution (truncated at 0.5 and 2  
427 times the average noise level).

428 To generate data with varying ground-truth dimensionality  $k$ , we first  
429 generated true, i.e. noise-free,  $n(\text{voxel}) \times m(\text{conditions})$  matrices with un-  
430 derlying pre-defined dimensionality. This was achieved by applying PCA to  
431 a random  $16 \times 16$  matrix and building a  $k$ -dimensional reconstruction of it.  
432 All eigenvalues of this initial  $k$ -dimensional matrix had the same value. Rows  
433 of this matrix were added to an  $n \times 16$  matrix. For each row, i.e. voxel, a  
434 specific amplitude was drawn from a normal distribution and added.

435 In the next step, we calculated the dot-product of the generated beta  
436 matrices and generated design matrices, which were HRF convolved. This  
437 resulted in noise-free fMRI time series.

438 A noise matrix was generated by randomly sampling from a Gaussian dis-  
439 tribution. The  $n(\text{voxel}) \times t(\text{timesteps})$  matrix was then spatially smoothed  
440 and temporally smoothed with a Gaussian kernel of 4 FWHM. Finally, this  
441 temporally and spatially smoothed noise matrix was added to the noise-free  
442 time-series and the design matrix was fit to the resulting data using a GLM.  
443 This resulted in a (noisy) voxel  $\times$  conditions beta matrix for each simulated  
444 run. The generated beta matrices were then passed on to the dimensionality  
445 estimation.

446 To gather a reliable estimate of the performance of our procedure, we  
447 ran a total of 100 of these simulations for each combination of ground-truth  
448 dimensionality and noise-level.

449 We then estimated the dimensionality for each simulated participant as  
450 described above and passed each participant's average estimated dimension-

451 ality and the standard deviation of this estimate to the described hierarchical  
452 Bayesian model. To assess the goodness of the estimated dimensionalities,  
453 we combined all posterior estimates of the single simulated participants' di-  
454 mensionalities (parameter  $\mu_i$ ) across all simulated voxels. The width of the  
455 distributions of these posteriors reflects the uncertainty of the estimated pop-  
456 ulation dimensionality, and the distributions' means reflect the estimated  
457 population dimensionality.

### 458 *3.2. Results and Discussion*

459 Across 100 simulations of data with a ground-truth dimensionality of 4, 8,  
460 or 12 and ten different noise levels, we assessed how estimated dimensional-  
461 ities are affected by noise and how this effect interacts with the ground-truth  
462 dimensionality.

463 Ideally, our method would exhibit these properties: 1) The posterior es-  
464 timate of the degree of underlying dimensionality should be close to the  
465 ground-truth dimensionality when the signal-to-noise ratio is high. 2) The  
466 uncertainty of the posterior estimate should increase with increasing noise-  
467 levels. 3) Estimates should gracefully degrade such that as noise increases the  
468 relative order of ground-truth dimensionalities should still be reflected in the  
469 estimated dimensionalities and the posteriors still contain the ground-truth  
470 values. 4) With increasing noise, the relative importance of the prior should  
471 increase and in the limit all ground-truth dimensionalities should converge  
472 to the mean of the prior.

473 As can be seen in Figure 5A, the results from the simulation show that  
474 our method meets all four criteria. For a low noise level, the estimated di-  
475 mensionalities largely overlap with the ground-truth and are very consistent  
476 across simulated participants. With increasing noise, estimated dimension-  
477 alities deviate more strongly from the underlying ground-truth and move  
478 towards the mean of the uniform prior. Furthermore, the uncertainty in the  
479 dimensionality estimates increases, reflected in the width of the distributions.

480 Figure 5B shows the average reconstruction correlations with the held  
481 out test data for the different ground-truth dimensionalities and the different  
482 noise levels, which are highly overlapping.

483 An additional observation from the simulation results is that moderate  
484 levels of noise can lead to a small inflation of estimated dimensionalities  
485 for higher ground-truth dimensionality levels, as seen here for the case of a  
486 dimensionality of 8. This effect is due to the correlational structure of noise  
487 in fMRI data. The SVD is sensitive to this correlational structure and as

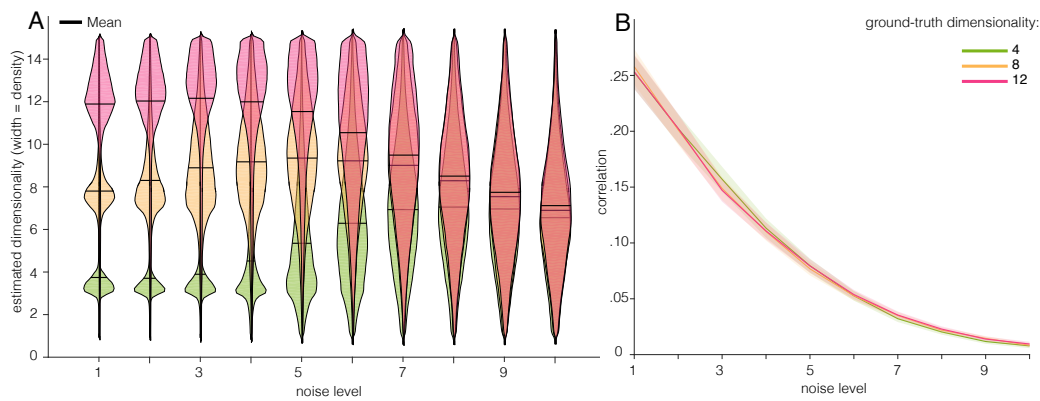

Figure 5: Results from the simulation. A: Distributions of single-subject posterior dimensionality estimates for a ground-truth dimensionality of 4, 8, or 12 and increasing noise levels. As noise increases, the estimates become less accurate and less certain, as indicated by the width of the distributions. For the highest noise level, the posterior distributions for all ground-truth dimensionalities overlap largely. B: Average reconstruction correlations for the different ground-truth dimensionalities and increasing noise levels. As the noise level increases, reconstruction correlations drop, and this effect is the same across the three different ground-truth dimensionalities.

488 a result, singular values that reflect noise could surpass singular values that  
489 reflect signal. This would then cause an overestimation of the underlying  
490 dimensionality, since keeping a noise-carrying singular component would not  
491 improve the correlation with the held-out validation data, but adding the  
492 next, signal-carrying singular value to the reconstruction would. However,  
493 this inflation is only minor. It does not violate the rank order of the posterior  
494 dimensionality estimates and the distribution of the posterior dimensionality  
495 estimates reflects the increased uncertainty in the estimate.

496 Together, these simulations show that our procedure is suitable to provide  
497 an accurate estimate of the degree of underlying functional dimensionality for  
498 good signal-to-noise ratios. Moreover, the access to the whole distribution of  
499 dimensionality estimates allows to draw valid inferences on the relative degree  
500 of functional dimensionality even under high noise, and the width of the dis-  
501 tribution of these estimates reflects the uncertainty of these estimates. Thus,  
502 the combination of cross-validated SVD and hierarchical Bayesian modeling  
503 can provide a robust and interpretable estimated distribution of the degree  
504 of underlying functional dimensionality, which reflects the certainty in the  
505 estimate.

## 506 4. Data sets

507 Following the successful tests of our procedure with simulated data, we  
508 applied our method to three different, previously published fMRI datasets, all  
509 employing visual stimuli and testing healthy populations. We tested three  
510 core aims of our method: 1) Identifying areas carrying functional dimen-  
511 sionality, 2) Using functional dimensionality to assess sensitivity to stimulus  
512 features, and 3) Measuring task-dependent differences in dimensionality.

### 513 4.1. *Identifying areas carrying functional dimensionality*

514 Using data from a category learning study by Mack et al. (2013), we aimed  
515 to identify areas carrying functional dimensionality and compare them with  
516 the areas found by the original authors' model-based analysis. Model-based  
517 analyses test specific assumptions about representational geometry that our  
518 approach does not. Furthermore, these analyses require some underlying  
519 dimensionality to identify an area. Therefore, we expected our method to  
520 reveal significant functional dimensionality in all areas that were reported in  
521 the original study, as well as additional areas that were reliably modulated by

522 the task in a way that was not captured by the model tested in the original  
523 publication.

#### 524 *4.1.1. Methods*

525 Participants were trained on categorizing nine objects that differed on four  
526 binary dimensions: shape (circle/triangle), color (red/green), size (large/small),  
527 and position (left/right). During the fMRI session, participants were pre-  
528 sented with the set of all 16 possible stimuli and had to perform the same  
529 categorization task. Out of 23 participants, 20 were included in the final  
530 analysis presented here, with 19 participants completing 6 runs composed of  
531 48 trials and one participant completing 5 runs.

532 Standard pre-processing steps were carried out using SPM12 (Penny et al.,  
533 2006) and beta estimates were derived from a GLM containing one regres-  
534 sor per stimulus (16 in total, see Supplemental Materials for details). The  
535 dataset was retrieved from `osf.io/62rgs`.

536 We ran a whole-brain searchlight with a 7mm radius sphere and a voxel  
537 size of  $3 \times 3 \times 3$ mm to estimate which brain areas carry signal with func-  
538 tional dimensionality, that is, signal that could be reliably predicted across  
539 runs based on a low-dimensional reconstruction. For each searchlight, data  
540 were pre-whitened and mean-centered as described above. Dimensionality  
541 estimation was performed as previously described and the resulting  $j$  cor-  
542 relations and dimensionality estimates were ascribed to the center of the  
543 searchlight. The code for the searchlight was based on the RSA toolbox (Nili  
544 et al., 2014).

545 For each voxel, the  $j$  correlation coefficients were averaged and their sig-  
546 nificance was assessed via non-parametric one-sample t-tests across subjects  
547 using FSL's randomise function (Winkler et al., 2014). Results were family-  
548 wise error (FWE) corrected using a TFCE threshold of  $p < .05$ .

549 In their original analysis, the authors fit a cognitive model to participants  
550 classification behavior to estimate attention-weights to the single stimulus  
551 features. Based on these attention weights, they derived model-based simi-  
552 larities between stimuli and used RSA to examine which brain regions show  
553 a representational geometry that matches with these predictions. We repli-  
554 cated this analysis using the same beta estimates that were passed on to the  
555 dimensionality estimation in order to maximize comparability of the two ap-  
556 proaches. As for estimating the dimensionality, we ran a whole-brain search-  
557 light with a 7mm radius sphere (based on the RSA toolbox, Nili et al., 2014).  
558 We averaged voxel response patterns across runs and calculated the repre-

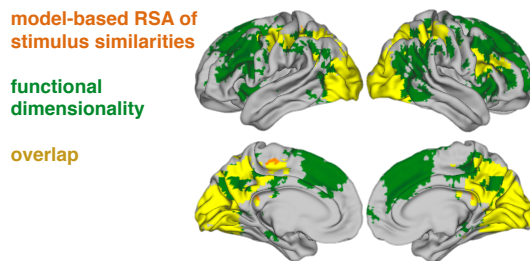

Figure 6: Areas that showed significant functional dimensionality (green), significant fit with the RSA comparing neural representational similarity with model-based predictions of stimulus similarity (orange), or both (yellow). FWE-corrected using a TFCE threshold of  $p < .05$ . Notably, our method identifies large clusters of functional dimensionality in prefrontal cortex, indicating that areas here were consistently engaged by the task, though their patterns did not fit with the implemented cognitive model.

559 sentational distance matrices (RDM) as all pairwise 1–Pearson correlation  
560 distance. We assessed correspondence of these RDMs with the model-based  
561 distance matrices via Spearman correlation. The resulting Spearman corre-  
562 lation for each participant was assigned to the center of the searchlight and  
563 their significance was assessed via non-parametric one-sample t-tests across  
564 subjects using FSL’s randomise function (Winkler et al., 2014). Results were  
565 family-wise error (FWE) corrected using a TFCE threshold of  $p < .05$ .

#### 566 4.1.2. Results

567 We aimed to identify areas that show functional dimensionality and ex-  
568 amine how those overlap with the authors’ original findings implementing a  
569 model-based analysis. We found significant dimensionality (i.e., reconstruc-  
570 tion correlations) in an extended network of occipital, parietal and prefrontal  
571 areas (see Figure 6). In these areas, signal was reliable across runs and showed  
572 functional dimensionality.

573 As can be seen in Figure 6, our method successfully identified all areas  
574 that were found in the original model-based analysis, which bolsters the  
575 authors original interpretation of their results. Notably, we were able to  
576 identify further areas that did not show a fit with the implemented attention-  
577 based model, suggesting that signal changes in those areas reflect a different  
578 aspect of the task space than captured by the cognitive model.



579 *4.1.3. Discussion*

580 Within the first dataset, we showed that by identifying areas with signifi-  
581 cant functional dimensionality, it is possible to reveal areas that can plausibly  
582 be tested for correspondence with a hypothesized representational similarity  
583 structure, as for instance derived from a cognitive model. More specifically,  
584 we were able to identify all areas that have been reported in the original anal-  
585 ysis by Mack et al. (2013) to show a representational similarity as predicted  
586 by a cognitive model. Additionally, we found further areas that had not been  
587 revealed in the original analysis to show functional dimensionality. This in-  
588 dicates that those areas have a reliable functional dimensionality but reflect  
589 cognitive processes or task-aspects that are not captured by the cognitive  
590 model. For instance, activation in the medial BA 8 has been found to cor-  
591 relate with uncertainty and task-difficulty (Volz et al., 2005; Huettel, 2005;  
592 Crittenden and Duncan, 2014), suggesting that the neural patterns in this  
593 region in the current task might reflect processes related to the difficulty or  
594 category uncertainty of the categorization decision for each stimulus. Given  
595 that our method identifies more areas than model-based RSA, one might  
596 be tempted to view it as a more powerful and statistical sensitive version of  
597 RSA, but such an interpretation would be incorrect. Whereas RSA evaluates  
598 specific assumptions regarding representational geometry, tests of functional  
599 dimensionality depend solely on reliability of patterns (assessed across runs).  
600 Together, the findings highlight the potential of our procedure to aid evalu-  
601 ation of model performance and identify areas ahead of model-fitting.

602 *4.2. Using functional dimensionality to assess sensitivity to stimulus features*

603 Using data from a study with real-world categories and photographic  
604 stimuli by Bracci and Op de Beeck (2016), we tested whether different  
605 brain regions show functional dimensionality in response to different stimulus  
606 groupings (i.e., depending on how the stimulus-space is summarized). For ex-  
607 ample, the columns in the data matrix may be organized along either visual  
608 categories or shape. In this fashion, our technique could be useful in eval-  
609 uating general hypotheses regarding the nature and basis of the functional  
610 dimensionality in brain regions.

611 *4.2.1. Methods*

612 During the experiment, participants were presented repeatedly with 54  
613 different natural images that were of nine different shapes and belonged to six  
614 different categories (minerals, animals, fruit/vegetables, music instruments,

615 sport instruments, tools), allowing the authors to dissociate between neural  
616 responses reflecting shape or category information.

617 Standard pre-processing of the data was carried out using SPM12 (see  
618 Supplemental Material for details). In line with the authors original analysis,  
619 we tested for differences depending on whether the stimuli were averaged to  
620 emphasize their category or shape information. To that end, we constructed  
621 two separate GLMs. The first GLM (catGLM) was composed of one regressor  
622 per category (six in total), thus averaging across objects shapes. The second  
623 GLM (shapeGLM) consisted of nine different regressors, one for each shape,  
624 averaging neural responses across object categories. In both GLMs, regres-  
625 sors were convolved with the HRF and six motion-regressors as covariates of  
626 no interest were included.

627 Dimensionality was estimated separately for both GLMs. We ran a whole-  
628 brain searchlight with a 7mm sphere (voxel size of  $3 \times 3 \times 3mm$ ) on the beta  
629 estimates of the respective GLM, again pre-whitening and mean-centering  
630 voxel patterns within each searchlight before estimating the dimensionality.  
631 Reconstruction correlations were averaged across runs for each participant  
632 and tested for significance across participants using FSL's randomise func-  
633 tion (Winkler et al., 2014). Results were FWE corrected using a TFCE  
634 threshold of  $p < .05$ .

#### 635 *4.2.2. Results*

636 When testing for functional dimensionality for the shape-sensitive GLM,  
637 we found significant reconstruction correlations in bilateral posterior occipito-  
638 temporal and parietal regions, indicating functional dimensionality in these  
639 areas. Additionally, a significant cluster was revealed in the left lateral pre-  
640 frontal cortex (see Figure 7). Testing for functional dimensionality for the  
641 category-sensitive GLM also revealed strong significant correlations in occip-  
642 ital and posterior-temporal regions, but notably showed more pronounced  
643 correlations in bilateral lateral and medial prefrontal areas as well. This is  
644 in line with the authors original findings that showed that neural patterns in  
645 parietal and prefrontal ROIs correlated more strongly with a model reflect-  
646 ing category similarities, whereas shape similarities were largely restricted to  
647 occipital and posterior temporal ROIs.

#### 648 *4.2.3. Discussion*

649 With the second dataset, we tested whether different areas are identi-  
650 fied to express significant functional dimensionality depending on how the

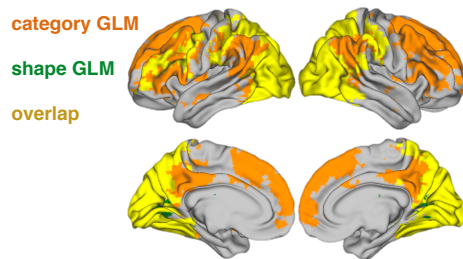

Figure 7: Areas showing significant functional dimensionality for the shape GLM (green), the category GLM (orange), or both (yellow). Results are FWE-corrected using an TFCE threshold of  $p < .05$ . Across both GLMs, posterior and parietal regions show functional dimensionality. Prefrontal regions show more pronounced functional dimensionality for the category GLM, in line with the original findings.

651 underlying task-space is summarized. In line with the original authors'  
652 findings (Bracci and Op de Beeck, 2016), we found more pronounced func-  
653 tional dimensionality in prefrontal regions for the GLM emphasizing the  
654 category-information across stimuli, compared to the one focusing on shape-  
655 information. Likewise, functional dimensionality in occipital regions was  
656 more pronounced for the shape-based GLM.

657 However, compared to the authors' original findings, we did not find a  
658 sharp dissociation between shape and category. For example, we find both  
659 shape and category dimensionality present in early visual regions and shape  
660 dimensionality extending into frontal areas.

661 As discussed in the previous section, our method provides a general test  
662 of dimensionality whereas the original authors evaluate specific representa-  
663 tional accounts that make additional assumptions about shape and category  
664 similarity structure. Comparing results suggest that to some degree the dis-  
665 sociation found in Bracci and Op de Beeck (2016) rests on these specific  
666 assumptions. A more general test of functional dimensionality, for stimuli  
667 organized along shape or category, provides additional information to assist  
668 in interpreting the cognitive function of these brain regions, which comple-  
669 ments testing more specific representational accounts.

670 Additional information could be gleaned by estimating differences in di-  
671 mensionality. In the case of the shape and category GLMs considered in  
672 this section, interpretation would be somewhat complicated by the different  
673 properties of these two GLMs, including differences in the maximum possible  
674 number of dimensions. In the next section, we consider a more straightfor-

675 ward case in which the same GLM is used to compare task influences on  
676 functional dimensionality.

#### 677 *4.3. Measuring task-dependent differences in dimensionality*

678 In this third dataset, we consider whether the underlying dimensional-  
679 ity of neural representations changes as a function of task. In Mack et al.  
680 (2016), participants learned a categorization rule over a common stimulus  
681 set that either depended on one or two stimulus dimensions. We predicted  
682 that the estimated functional dimensionality, as measured by our hierarchi-  
683 cal Bayesian method, should be higher for the more complex categorization  
684 problem, extending the original authors' findings.

##### 685 *4.3.1. Methods*

686 Participants learned to classify bug stimuli that varied on three binary  
687 dimensions (mouth, antenna, legs) into two contrasting categories based on  
688 trial-and-error learning. Over the course of the experiment, participants  
689 completed two learning problems (in counterbalanced order). Correct classi-  
690 fication in type I problem required attending to only one of the bugs features,  
691 whereas classification in type II problem required combining information of  
692 two features in an exclusive-or manner.

693 Previous research has shown that neural dimensionality appropriate for  
694 the problem at hand is linked to successful task performance (Rigotti et al.,  
695 2013). Thus, we hypothesized that dimensionality of the neural response  
696 would be higher for type II compared to type I in areas known to process  
697 visual features, as for instance lateral occipito-temporal cortex (LOC; see e.g.  
698 Eger et al., 2008). We included data from 22 participants in our analysis (one  
699 participant was excluded due to artifacts in the fMRI data, please refer to  
700 the Supplemental Material for further details on the experiment and data  
701 preprocessing). The dataset was retrieved from [osf.io/5byhb](https://osf.io/5byhb).

702 In order to infer the degree of functional dimensionality, we estimated it  
703 across ROIs encompassing LOC in the left and right hemisphere separately  
704 for the two categorization tasks. Because the relevant stimulus dimensions  
705 were learned through trial-and-error learning, we excluded the first functional  
706 run (early learning) of each problem and analyzed the remaining three runs  
707 for each problem.

708 Prior to estimating the dimensionality, data were pre-whitened and mean-  
709 centered. Dimensionality was estimated across all voxels for each ROI and

710 problem, resulting in 3 (runs)  $\times$  2 (ROIs)  $\times$  2 (problems) correlation co-  
711 efficients and dimensionality estimates. Correlation coefficients were aver-  
712 aged per participant, ROI and problem and tested for significance using  
713 one-sample  $t$ -tests. To derive the best population estimate for the under-  
714 lying dimensionality for each ROI and problem, we implemented the above  
715 described hierarchical Bayesian model. To that end, we calculated mean and  
716 standard deviation of each participant's dimensionality estimate per ROI  
717 and problem and used those summary statistics to estimate the degree of  
718 underlying dimensionality for each ROI and problem.

#### 719 4.3.2. Results

720 Estimating dimensionality across two different ROIs in LOC and two  
721 different tasks allowed us to test whether the estimated dimensionality differs  
722 across problems with different task-demands. As participants had to pay  
723 attention to one stimulus feature in the type I problem and two stimulus  
724 features in the the type II problem, we hypothesized that dimensionality of  
725 the neural response would be higher for type II compared to type I in an  
726 LOC ROI.

727 Both ROIs showed significant reconstruction correlations across both tasks  
728 (lLOC, type I:  $t_{21} = 3.08, p = .006$ ; rLOC, type I:  $t_{21} = 2.21, p = .038$ ; lLOC,  
729 type II:  $t_{21} = 3.03, p = .006$ ; rLOC, type II:  $t_{21} = 3.37, p = .003$ ). This shows  
730 that signal in the LOC showed reliable functional dimensionality across runs  
731 for both problem types, which is a prerequisite for estimating the degree of  
732 functional dimensionality.

733 To estimate whether the dimensionality differed across problems, we ana-  
734 lyzed the data by implementing a multilevel Bayesian model using Stan (The  
735 Stan Development Team, 2017), see Figure 2 for an illustration of the model.  
736 As hypothesized, the estimated underlying dimensionality was higher for the  
737 type II problem compared to type I (type I:  $\mu_{left} = 2.92$  (CI 95% : 1.33, 4.33),  
738  $\mu_{right} = 2.66$  (CI 95% : 1.23, 4.14); type II:  $\mu_{left} = 4.74$  (CI 95% : 3.20, 6.46),  
739  $\mu_{right} = 4.69$  (CI 95% : 3.56, 6.06), see Figure 8).

#### 740 4.3.3. Discussion

741 Besides knowing which areas show neural patterns with functional di-  
742 mensionality, an important question concerns the degree of the underlying  
743 dimensionality. Using data from a categorization task where participants  
744 had to attend to either one or two features of a stimulus, we demonstrate

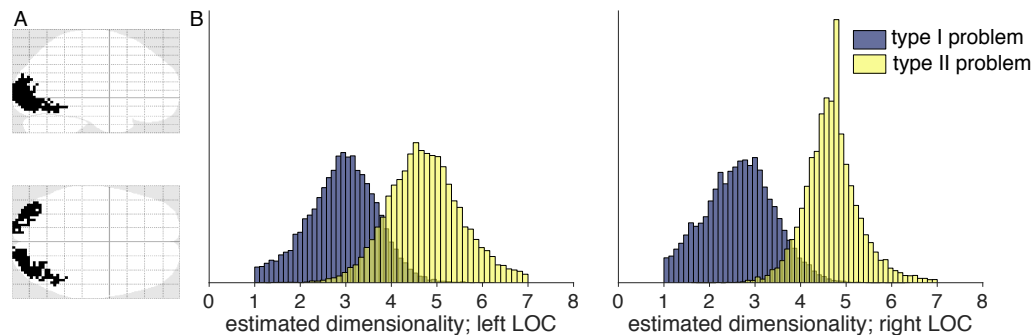

Figure 8: Results of estimating functional dimensionality for two different categorization problems. A: Outline of the two ROIs in left and right LOC. B: Histograms of posterior distributions of estimated dimensionalities in left and right LOC for the type I and II problems. Dimensionalities were estimated by implementing separate multilevel models for each ROI and model using Stan. Across both ROIs, the peak of the posterior distributions of the estimated dimensionality for type II was higher than for type I, mirroring the structure of the two problems.

745 how our method can be used to test whether the degree of underlying dimen-  
746 sionality of neural patterns varies with task demands. A notable strength  
747 of the dataset for our research question is that the authors used the same  
748 stimuli in a within-subject paradigm, counterbalancing the order of the two  
749 categorization tasks across subjects. This allowed us to investigate how the  
750 dimensionality of a neural pattern changes with task, while controlling for  
751 possible effects due to differences in signal-to-noise ratios across participants  
752 or brain regions.

753 Our results show that, as expected, the degree of underlying functional  
754 dimensionality is higher when the task required attending to two stimulus  
755 features instead of only one. Notably, this assumption was implicit to the  
756 conclusions drawn by the authors in the original publication (Mack et al.,  
757 2016). The authors analyzed neural patterns in hippocampus and imple-  
758 mented a cognitive model to show that stimulus-specific neural patterns were  
759 stretched across relevant compared to irrelevant dimensions. Thus, irrelevant  
760 dimensions were compressed and the dimensionality of the neural pattern  
761 was reduced the less dimensions were relevant to the categorization problem.  
762 Our approach allows to directly assess this effect without the need of fitting  
763 a cognitive model.

## 764 5. General Discussion

765 Multivariate and model-based analyses of fMRI data have deepened our  
766 understanding of the human brain and its representational spaces (Norman  
767 et al., 2006; Kriegeskorte and Kievit, 2013; Haxby et al., 2014; Turner et al.,  
768 2017). However, before evaluating specific representational accounts, it is  
769 sensible to first ask the more basic question of whether brain areas displays  
770 functional dimensionality more generally. Here, we presented a novel ap-  
771 proach to estimate an area’s functional dimensionality by a combined SVD  
772 and cross-validation procedure. Our procedure identifies areas with signif-  
773 icant functional dimensionality and provides an estimate, reflecting uncer-  
774 tainty, of the degree of underlying dimensionality. Across three different data  
775 sets, we confirmed and extended the findings from the original contributions.

776 After verifying the operation of the method with a synthetic (simulated)  
777 dataset in which the ground-truth dimensionalities were known, we applied  
778 our method to three published fMRI datasets. In each case, the procedure  
779 confirmed and extended the authors’ original findings, advancing our un-  
780 derstanding of the function of the brain regions considered. Each of three  
781 datasets highlighted a potential use of estimating functional dimensionality.

782 In the first study, working with data from Mack et al. (2013), we demon-  
783 strated that testing for functional dimensionality can complement model-  
784 based fMRI analyses that evaluate more specific representational hypothe-  
785 ses. First, one cannot find a rich relationship between model representations  
786 and brain measures when there is no functional dimensionality in regions  
787 of interest. Second, there might be additional areas that display significant  
788 functional dimensionality that do not show correspondence with the model.

789 These additional areas invite further analysis as they might implement  
790 processes and representations outside the scope of the tested model. Func-  
791 tional dimensionality can indicate interesting unexplained signal. For exam-  
792 ple, in the first dataset examined, functional dimensionality was found in  
793 all the areas identified by Mack et al. (2013), plus medial BA 8, which is a  
794 candidate region for task difficulty and response conflict (see Alexander and  
795 Brown, 2011, for a model of medial prefrontal cortex function), which was  
796 not the authors’ original focus but may merit further study.

797 In the second study, working with data from Bracci and Op de Beeck  
798 (2016), we demonstrated how stimuli could be grouped or organized in differ-  
799 ent fashions to explore how dimensional organization varies across the brain.  
800 In this case, the data matrix was either organized along shape or category.

801 We found neural patterns of shape and category selectivity consistent with  
802 the authors' original results. However, we found the selectivity to be more  
803 mixed in our analyses and identified additional responsive regions, mirroring  
804 our results when we considered data from Mack et al. (2013).

805 Our method may have been more sensitive to signal because it makes  
806 fewer assumptions about the underlying representational structure and al-  
807 lows for individual differences in the underlying dimensions. In this sense,  
808 assessing functional complexity complements existing analysis procedures.  
809 Indeed, our approach could be used to evaluate multiple stimulus groupings  
810 to inform feature selection in encoding models (Diedrichsen and Kriegeskorte,  
811 2017; Naselaris et al., 2011).

812 In a third study, working with data from Mack et al. (2016), we evaluated  
813 whether our method could identify changes in task-driven dimensionality. By  
814 combining estimates of functional dimensionality with a hierarchical Bayesian  
815 model, we found that the functional dimensionality in LOC was higher when  
816 a category decision required using two features rather than one. These results  
817 are consistent with the original authors' theory but were hitherto untestable.

818 In summary, assessing functional dimensionality across these three studies  
819 complemented the original analyses and revealed additional nuances in the  
820 data. In each case, our understanding of the neural function was further  
821 constrained. Moreover, comparing the results to those from model-based  
822 and other multivariate approaches was informative in terms of understanding  
823 underlying assumptions and their importance.

824 Of course, as touched upon in the Introduction, there are many possible  
825 ways to assess dimensional structure in brain measures and progress has been  
826 made on this challenge (Rigotti et al., 2013; Machens et al., 2010; Rigotti and  
827 Fusi, 2016; Diedrichsen et al., 2013; Bhandari et al., 2017; Lehky et al., 2014).  
828 Here, our aim was to specify a general, computational efficient, robust, and  
829 relatively simple and interpretable procedure that can easily be applied to  
830 whole brain data to first test for statistical significant functional dimension-  
831 ality and, if found, to provide an estimate of its magnitude using Bayesian  
832 hierarchical modeling to make clear the uncertainty in that estimate.

833 We hope our contribution is useful to researches interested in further  
834 exploring their data, whether it be fMRI, MEG, EEG, or single-cell record-  
835 ings. Researchers may consider variants of our method. For example, as  
836 mentioned in the Introduction, the SVD could be substituted with another  
837 procedure depending on the needs and assumptions of the researchers. There  
838 is no magic bullet to the difficult problems of estimating the underlying di-



839 dimensionality of noisy neural data, but we have made progress on this issue  
840 both theoretically and practically. In doing so, we have also provided addi-  
841 tional insights into the brain basis of visual categorization. We hope that  
842 by demonstrating the merits of estimating the functional dimensionality of  
843 neural data that we motivate others to take advantage of this additional and  
844 complementary viewpoint on neural function.

## 845 **6. Data availability**

846 A Matlab toolbox for estimating functional dimensionality of fMRI data  
847 as well as data needed to replicate the analyses presented here will be made  
848 available after publication. Nifti files and code for the analyses presented  
849 here are available from the authors upon request.

## 850 **7. Acknowledgments**

851 This work was funded by the National Institutes of Health [grant number  
852 1P01HD080679]; the Leverhulme Trust [grant number RPG-2014-075]; and  
853 Wellcome Trust Senior Investigator Award [WT106931MA] to Bradley C.  
854 Love. Correspondences regarding this work can be sent to [c.ahlheim@ucl.ac.uk](mailto:c.ahlheim@ucl.ac.uk)  
855 or [b.love@ucl.ac.uk](mailto:b.love@ucl.ac.uk). The authors are grateful to all study authors for sharing  
856 their data and wish to thank all members of the LoveLab and Jan Balaguer  
857 for valuable input. Declarations of interest: none.

858 **8. References**

- 859 Alexander, W. H. and Brown, J. W. (2011). Medial prefrontal cortex as an  
860 action-outcome predictor. *Nature Neuroscience*, 14(10):1338–1344.
- 861 Allefeld, C. and Haynes, J.-D. (2014). Searchlight-based multi-voxel pattern  
862 analysis of fMRI by cross-validated MANOVA. *NeuroImage*, 89:345–357.
- 863 Bhandari, A., Rigotti, M., Gagne, C., Fusi, S., and Badre, D. (2017). Char-  
864 acterizing human prefrontal cortex representations with fMRI. In *Society  
865 for Neuroscience*, Washington, DC:.
- 866 Bracci, S., Daniels, N., and Op de Beeck, H. (2017). Task Context Overrides  
867 Object- and Category-Related Representational Content in the Human  
868 Parietal Cortex. *Cerebral Cortex*, pages 1–12.
- 869 Bracci, S. and Op de Beeck, H. (2016). Dissociations and associations be-  
870 tween shape and category representations in the two visual pathways. *Jour-  
871 nal of Neuroscience*, 36(2):432–444.
- 872 Cattell, R. B. (1947). Confirmation and clarification of primary personality  
873 factors. *Psychometrika*, 12(3):197–220.
- 874 Cattell, R. B. (1966). The Scree Test For The Number Of Factors. *Multi-  
875 variate Behavioral Research*, 1(2):245–276.
- 876 Crittenden, B. M. and Duncan, J. (2014). Task difficulty manipulation re-  
877 veals multiple demand activity but no frontal lobe hierarchy. *Cerebral  
878 Cortex*, 24(2):532–540.
- 879 Davis, T., LaRocque, K. F., Mumford, J. A., Norman, K. A., Wagner, A. D.,  
880 and Poldrack, R. A. (2014). What do differences between multi-voxel and  
881 univariate analysis mean? How subject-, voxel-, and trial-level variance  
882 impact fMRI analysis. *NeuroImage*, 97:271–283.
- 883 Diedrichsen, J. and Kriegeskorte, N. (2017). Representational models: A  
884 common framework for understanding encoding, pattern-component, and  
885 representational-similarity analysis. *PLoS Computational Biology*, 13(4):1–  
886 33.

- 887 Diedrichsen, J., Provost, S., and Zareamoghaddam, H. (2016). On the  
888 distribution of cross-validated Mahalanobis distances. *arXiv preprint*  
889 *arXiv:1607.01371*, pages 1–24.
- 890 Diedrichsen, J., Wiestler, T., and Ejaz, N. (2013). A multivariate method  
891 to determine the dimensionality of neural representation from population  
892 activity. *NeuroImage*, 76:225–235.
- 893 Eckart, C. and Young, G. (1936). The approximation of one matrix by  
894 another of lower rank. *Psychometrika*, 1(3):211–218.
- 895 Eger, E., Ashburner, J., Haynes, J.-D., Dolan, R. J., and Rees, G. (2008).  
896 fMRI activity patterns in human LOC carry information about object  
897 exemplars within category. *Journal of cognitive neuroscience*, 20(2):356–  
898 370.
- 899 Friston, K. J., Frith, C. D., Liddle, P. F., and Frackowiak, R. S. J. (1993).  
900 Functional Connectivity: The Principal-Component Analysis of Large  
901 (PET) Data Sets. *Journal of Cerebral Blood Flow & Metabolism*, 13(1):5–  
902 14.
- 903 Fusi, S., Miller, E. K., and Rigotti, M. (2016). Why neurons mix: High di-  
904 mensionality for higher cognition. *Current Opinion in Neurobiology*, 37:66–  
905 74.
- 906 Goddard, E., Klein, C., Solomon, S. G., Hogendoorn, H., Thomas, A., and  
907 Klein, C. (2017). Interpreting the dimensions of neural feature represen-  
908 tations revealed by dimensionality reduction. *NeuroImage*.
- 909 Hastie, T., Tibshirani, R., and Friedman, J. (2009). Unsupervised Learn-  
910 ing. In *The Elements of Statistical Learning*, chapter 14, pages 485–585.  
911 Springer, New York, NY, second edition.
- 912 Haxby, J. V., Connolly, A. C., and Guntupalli, J. S. (2014). Decoding Neu-  
913 ral Representational Spaces Using Multivariate Pattern Analysis. *Annual*  
914 *review of neuroscience*, pages 435–456.
- 915 Hebart, M. N. and Baker, C. I. (2017). Deconstructing multivariate decoding  
916 for the study of brain function. *NeuroImage*.

- 917 Huettel, S. A. (2005). Decisions under Uncertainty: Probabilistic Context  
918 Influences Activation of Prefrontal and Parietal Cortices. *Journal of Neu-*  
919 *roscience*, 25(13):3304–3311.
- 920 Huettel, S. A., Song, A. W., and McCarthy, G. (2003). *Functional magnetic*  
921 *resonance imaging*. Sinauer Associates, Inc., Sunderland, Massachusetts,  
922 USA, second edition.
- 923 Huth, A. G., Nishimoto, S., Vu, A. T., and Gallant, J. L. (2012). A Continu-  
924 ous Semantic Space Describes the Representation of Thousands of Object  
925 and Action Categories across the Human Brain. *Neuron*, 76(6):1210–1224.
- 926 Khaligh-Razavi, S. M. and Kriegeskorte, N. (2014). Deep Supervised, but  
927 Not Unsupervised, Models May Explain IT Cortical Representation. *PLoS*  
928 *Computational Biology*, 10(11).
- 929 Kramer, M. A. (1991). Nonlinear principal component analysis using autoas-  
930 sociative neural networks. *AIChE Journal*, 37(2):233–243.
- 931 Kriegeskorte, N. and Kievit, R. A. (2013). Representational geometry: In-  
932 tegrating cognition, computation, and the brain. *Trends in Cognitive Sci-*  
933 *ences*, 17(8):401–412.
- 934 Kriegeskorte, N., Mur, M., Ruff, D. A., Kiani, R., Bodurka, J., Esteky, H.,  
935 Tanaka, K., and Bandettini, P. A. (2008). Matching Categorical Object  
936 Representations in Inferior Temporal Cortex of Man and Monkey. *Neuron*,  
937 60(6):1126–1141.
- 938 Kruschke, J. K. (2014). *Doing Bayesian data analysis : a tutorial with R,*  
939 *JAGS, and Stan*.
- 940 Ledoit, O. and Wolf, M. (2004). A well-conditioned estimator for large-  
941 dimensional covariance matrices. *Journal of Multivariate Analysis*,  
942 88(2):365–411.
- 943 Lehky, S. R., Kiani, R., Esteky, H., and Tanaka, K. (2014). Dimension-  
944 ality of object representations in monkey inferotemporal cortex. *Neural*  
945 *computation*, 1872(10):1840–1872.
- 946 Machens, C. K., Romo, R., and Brody, C. D. (2010). Functional, but not  
947 anatomical, separation of what and when in prefrontal cortex. *Journal of*  
948 *Neuroscience*, 30(1):350–360.

- 949 Mack, M. L., Love, B. C., and Preston, A. R. (2016). Dynamic updating  
950 of hippocampal object representations reflects new conceptual knowledge.  
951 *Proceedings of the National Academy of Sciences of the United States of*  
952 *America*, 113(46):13203–13208.
- 953 Mack, M. L., Preston, A. R., and Love, B. C. (2013). Decoding the brain’s  
954 algorithm for categorization from its neural implementation. *Current Bi-*  
955 *ology*, 23(20):2023–2027.
- 956 Naselaris, T., Kay, K. N., Nishimoto, S., and Gallant, J. L. (2011). Encoding  
957 and decoding in fMRI. *NeuroImage*, 56(2):400–410.
- 958 Nichols, T. and Holmes, A. (2003). Nonparametric Permutation Tests  
959 for Functional Neuroimaging. *Human Brain Function: Second Edition*,  
960 15(1):887–910.
- 961 Nili, H., Wingfield, C., Walther, A., Su, L., Marslen-Wilson, W., and  
962 Kriegeskorte, N. (2014). A Toolbox for Representational Similarity Anal-  
963 ysis. *PLoS Computational Biology*, 10(4):e1003553.
- 964 Norman, K. A., Polyn, S. M., Detre, G. J., and Haxby, J. V. (2006). Be-  
965 yond mind-reading: multi-voxel pattern analysis of fMRI data. *Trends in*  
966 *Cognitive Sciences*, 10(9):424–430.
- 967 Parpart, P., Jones, M., and Love, B. (2017). Heuristics as Bayesian inference  
968 under extreme priors. *Cognitive Psychology*, in press.
- 969 Penny, W., Friston, K., Ashburner, J., Kiebel, S., and Nichols, T. (2006).  
970 *Statistical Parametric Mapping: The Analysis of Functional Brain Images:*  
971 *The Analysis of Functional Brain Images*, volume 8. Academic press.
- 972 Rigotti, M., Barak, O., Warden, M. R., Wang, X.-J., Daw, N. D., Miller,  
973 E. K., and Fusi, S. (2013). The importance of mixed selectivity in complex  
974 cognitive tasks. *Nature*, 497(7451):1–6.
- 975 Rigotti, M. and Fusi, S. (2016). Estimating the dimensionality of neural  
976 responses with fMRI Repetition Suppression. *Arxiv*.
- 977 Shlens, J. (2014). A tutorial on principal component analysis. *arXiv*.

- 978 Smith, S. M. and Nichols, T. E. (2009). Threshold-free cluster enhancement:  
979 Addressing problems of smoothing, threshold dependence and localisation  
980 in cluster inference. *NeuroImage*, 44(1):83–98.
- 981 Spearman, C. (1904). General Intelligence, Objectively Determined and Mea-  
982 sured. *American Journal of Psychology*, 15(2):201–292.
- 983 The Stan Development Team (2017). MatlabStan: the MATLAB interface  
984 to Stan.
- 985 Turner, B. M., Forstmann, B. U., Love, B. C., Palmeri, T. J., and Van Maa-  
986 nen, L. (2017). Approaches to analysis in model-based cognitive neuro-  
987 science. *Journal of Mathematical Psychology*, 76:65–79.
- 988 Volz, K. G., Schubotz, R. I., and Von Cramon, D. Y. (2005). Variants of  
989 uncertainty in decision-making and their neural correlates. *Brain Research*  
990 *Bulletin*, 67(5):403–412.
- 991 Walther, A., Nili, H., Ejaz, N., Alink, A., Kriegeskorte, N., and Diedrich-  
992 sen, J. (2016). Reliability of dissimilarity measures for multi-voxel pattern  
993 analysis. *NeuroImage*, 137:188–200.
- 994 Winkler, A. M., Ridgway, G. R., Webster, M. A., Smith, S. M., and Nichols,  
995 T. E. (2014). Permutation inference for the general linear model. *Neu-  
996 roImage*, 92:381–397.
